# Supplementary material for: Magnetic resonance imaging in screening women at high risk of breast cancer: A meta-analysis
Source: PubMed Central journal article supplement — Medicine (Baltimore). 2023 Mar 10;102(10):e33146. doi: 10.1097/MD.0000000000033146 (PMC9997824; doi:10.1097/md.0000000000033146), 2023-03-10
Supplement: medi-102-e33146-s001.pdf [file medi-102-e33146-s001.pdf]

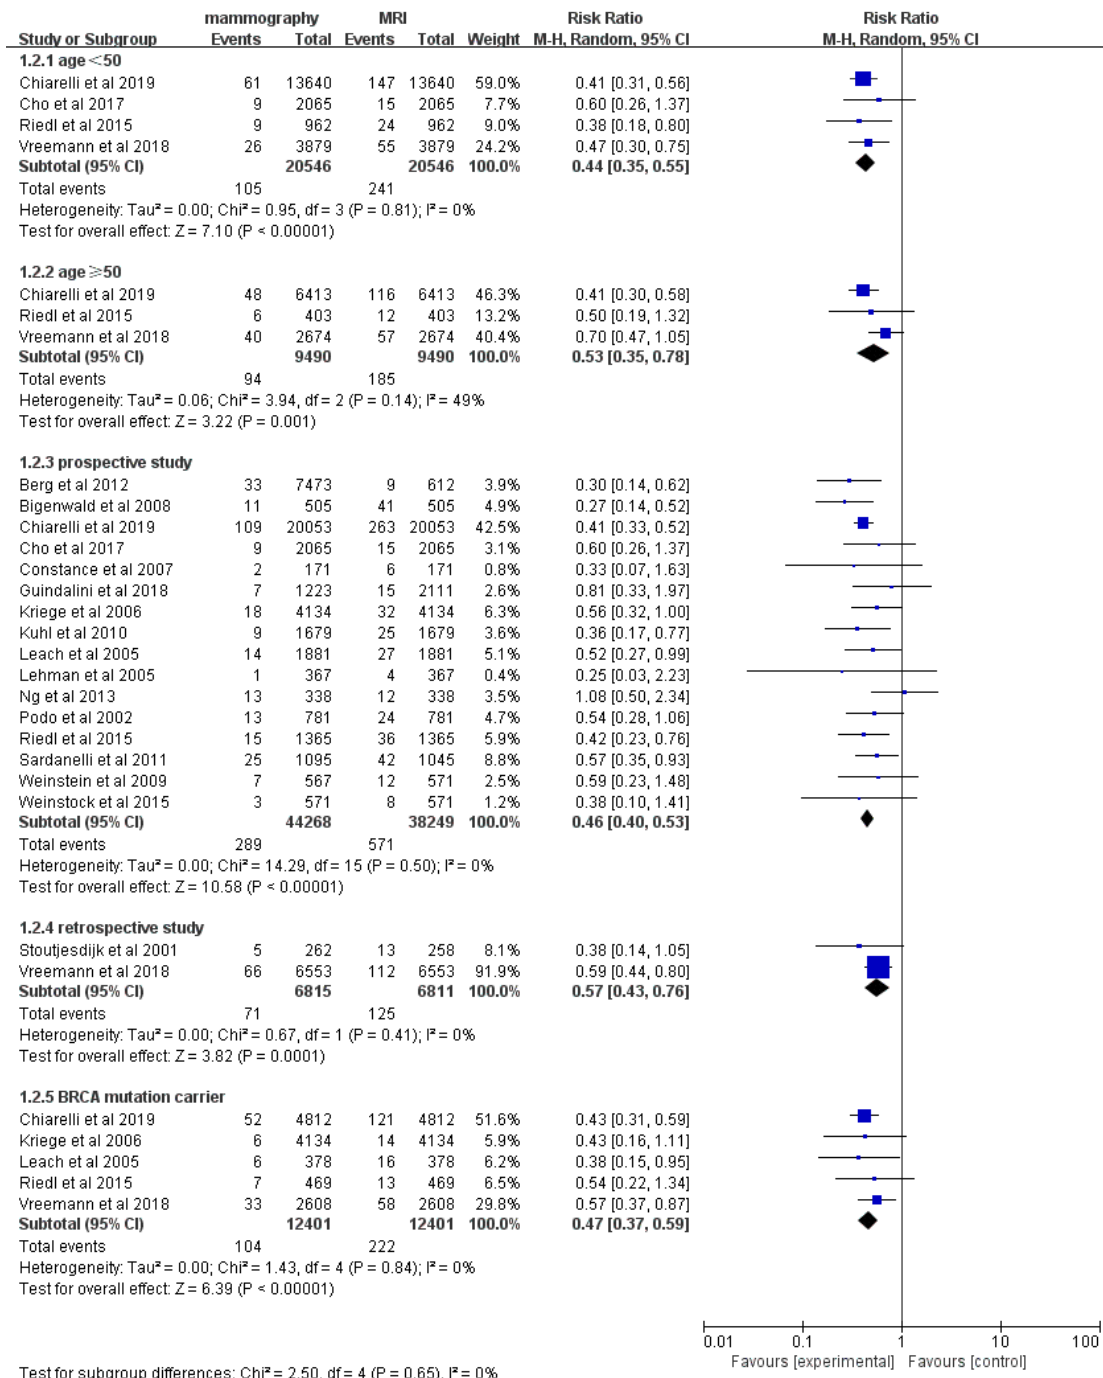

Figure 4, Supplementary File. Forest plot of subgroup analysis screening by mammography alone vs MRI alone.
